# Supplementary material
Source: Springer Nature journal article supplement (https://www.springermedizin.de/resource/supplementary/12998_2009_105_MOESM7_ESM.pdf/9623626)
Supplement: MOESM7 [file 9623626]

| Headache and other Conditions        | Intervention                        | Evidence      |          |      |
|--------------------------------------|-------------------------------------|---------------|----------|------|
|                                      |                                     | Inconclusive  | Moderate | High |
| Migraine Headache                    | Spinal manipulation                 |               | positive |      |
| Migraine Headache                    | Massage alone                       | favorable     |          |      |
| Tension type headache                | Spinal Manipulation                 | unclear       |          |      |
| Cervicogenic Headache                | Spinal Manipulation                 |               | positive |      |
| Cervicogenic Headache                | Self-mobilizing Apophyseal Glides   |               | positive |      |
| Cervicogenic Headache                | Friction massage and trigger points | non-favorable |          |      |
| Cervicogenic Headache                | Mobilization                        | unclear       |          |      |
| Miscellaneous Headache               | Mobilization                        | favorable     |          |      |
| Cervicogenic dizziness               | Self-mobilizing Apophyseal Glides   |               | positive |      |
| Temporo-mandibular joint dysfunction | Mobilization/ massage               | favorable     |          |      |
| Fibromyalgia                         | Massage                             | favorable     |          |      |
| Fibromyalgia                         | Spinal manipulation                 | unclear       |          |      |
| Fibromyalgia                         | Manual lymph drainage               | favorable     |          |      |
| Myofascial Pain Syndrome             | Massage                             | favorable     |          |      |
